# Supplementary material
Source: publisher site journal article supplement (https://kjim.org/upload/media/kjim-2024-011-Supplementary-Table-1.pdf)
Supplement: Supplementary file 1 [file kjim-2024-011-Supplementary-Table-1.pdf]

**Supplementary Table 1. Itemized analysis of BD patients who had ANCA but were not reclassified as having OS-BD-MPA, OS-BD-GPA, or OS-BD-EGPA according to the 2022 ACR/EULAR criteria for MPA, GPA, or EGPA**

| Patient's number | Scores based on the 2022 ACR/EULAR criteria for MPA | 1<br>(-3) | 2<br>(+6) | 3<br>(+3) | 4<br>(+3) | 5<br>(-1) | 6<br>(-4) |
|------------------|-----------------------------------------------------|-----------|-----------|-----------|-----------|-----------|-----------|
| 1                | 3                                                   | 1         | 1         | 0         | 0         | 0         | 0         |

1 = Nasal involvement (discharge, ulcers, crusting, congestion, septal defect/perforation); 2 = MPO-ANCA (or P-ANCA) positivity; 3 = Fibrosis or interstitial lung disease on chest imaging; 4 = Pauci-immune glomerulonephritis on biopsy; 5 = PR3-ANCA (or C-ANCA) positivity; 6 = Serum eosinophil count  $\geq 1,000/\mu\text{L}$

| Patient's number | Scores based on the 2022 ACR/EULAR criteria for GPA | 1<br>(+3) | 2<br>(+2) | 3<br>(+1) | 4<br>(+5) | 5<br>(+2) | 6<br>(+2) | 7<br>(+1) | 8<br>(+1) | 9<br>(-1) | 10<br>(-4) |
|------------------|-----------------------------------------------------|-----------|-----------|-----------|-----------|-----------|-----------|-----------|-----------|-----------|------------|
| 1                | 3                                                   | 1         | 0         | 0         | 0         | 0         | 0         | 1         | 0         | 1         | 0          |

1 = Nasal involvement (discharge, ulcers, crusting, congestion, septal defect/perforation); 2 = Cartilaginous involvement; 3 = Conductive or sensorineural hearing loss; 4 = PR3-ANCA (or C-ANCA) positivity; 5 = Pulmonary nodules, mass or cavitation; 6 = Granuloma, granulomatous inflammation, or giant cells on biopsy; 7 = Nasal/paranasal sinusitis or mastoiditis on imaging; 8 = Pauci-immune glomerulonephritis on biopsy; 9 = MPO-ANCA (or P-ANCA) positivity; 10 = Serum eosinophil count  $\geq 1,000/\mu\text{L}$

| Patient's number | Scores based on the 2022 ACR/EULAR criteria for EGPA | 1<br>(+3) | 2<br>(+3) | 3<br>(+1) | 4<br>(+5) | 5<br>(+2) | 6<br>(-3) | 7<br>(-1) |
|------------------|------------------------------------------------------|-----------|-----------|-----------|-----------|-----------|-----------|-----------|
| 1                | 0                                                    | 0         | 0         | 0         | 0         | 0         | 0         | 0         |

1 = Obstructive airway disease; 2 = Nasal polyps; 3 = Mononeuritis multiplex; 4 = Serum eosinophil count  $\geq 1,000/\mu\text{L}$ ; 5 = Extravascular eosinophilic predominant inflammation on biopsy; 6 = PR3-ANCA (or C-ANCA) positivity; 7 = Haematuria

BD, Behçet's disease; ANCA, antineutrophil cytoplasmic antibody; OS, overlap syndrome; MPA, microscopic polyangiitis; GPA, granulomatosis with polyangiitis; EGPA, eosinophilic GPA; ACR, the American College of Rheumatology; EULAR, the European Alliance of Associations for Rheumatology; MPO, myeloperoxidase; P, perinuclear; PR3, proteinase 3; C, cytoplasmic.
